# Supplementary material for: Author Correction: Early-childhood linear growth faltering in low- and middle-income countries
Source: PubMed Central journal article supplement (PMC11711084; doi:10.1038/s41586-024-08344-6), 2024-12-12

## Supplementary information

---

# Author Correction: Early-childhood linear growth faltering in low- and middle-income countries

---

In the format provided by the authors and unedited

# Original Figure 3a

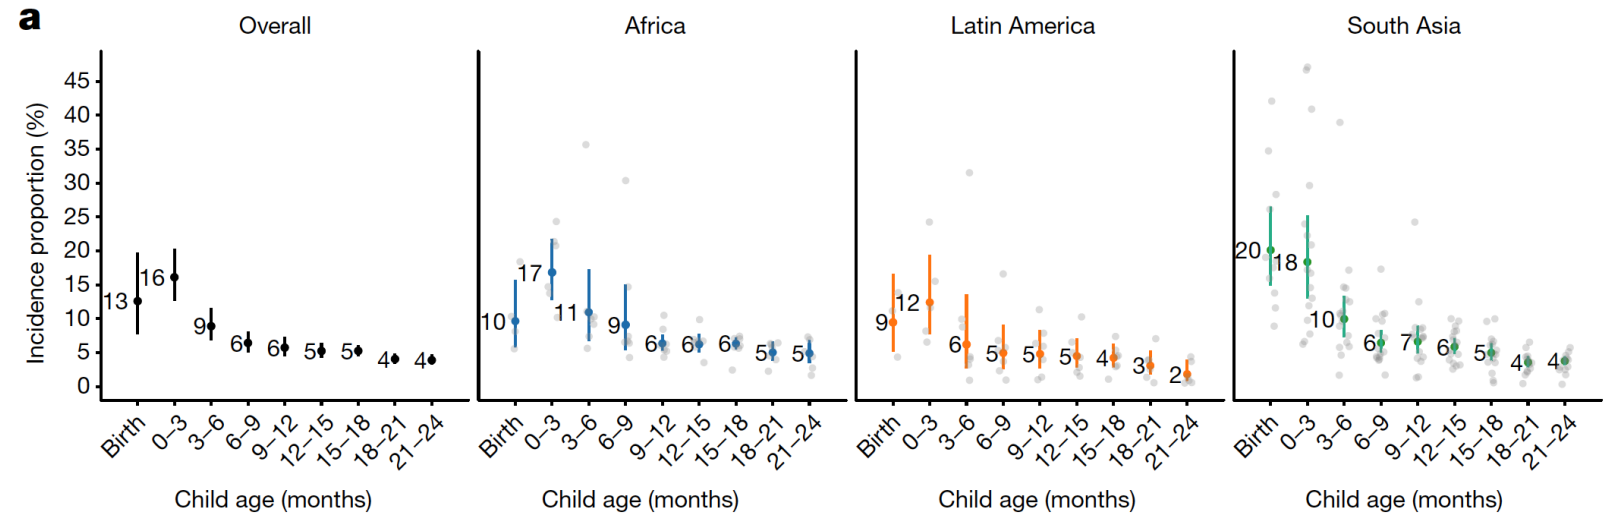

# Corrected Figure 3a (coding error corrected)

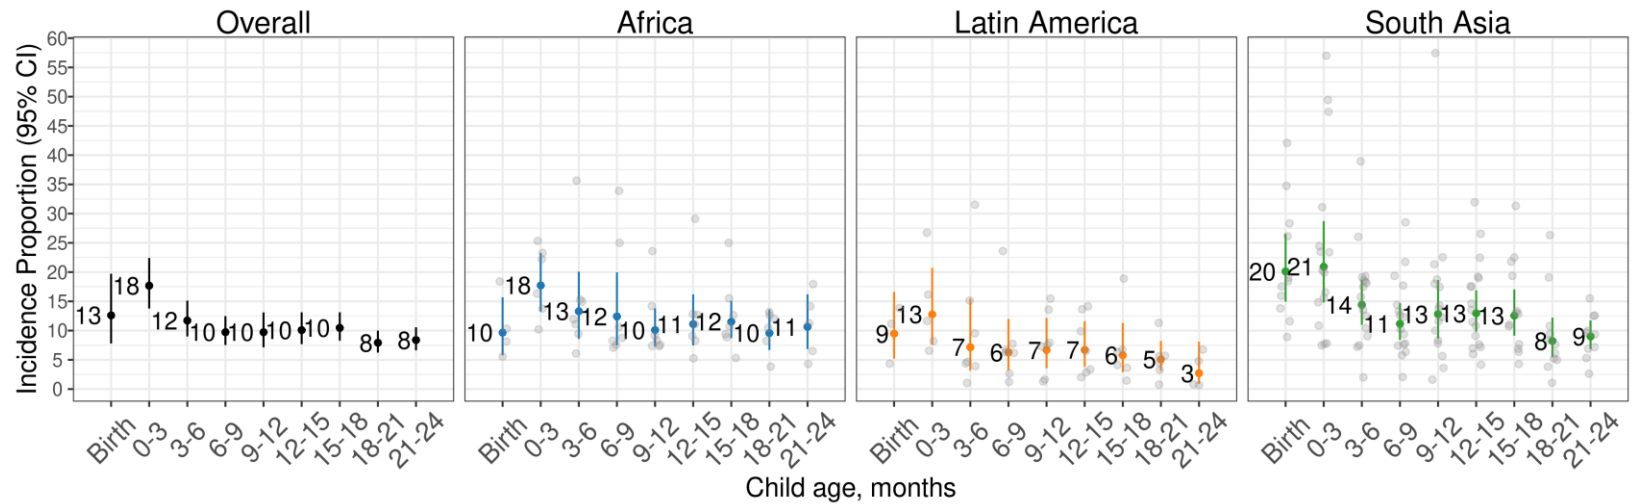

Original Figure 4b

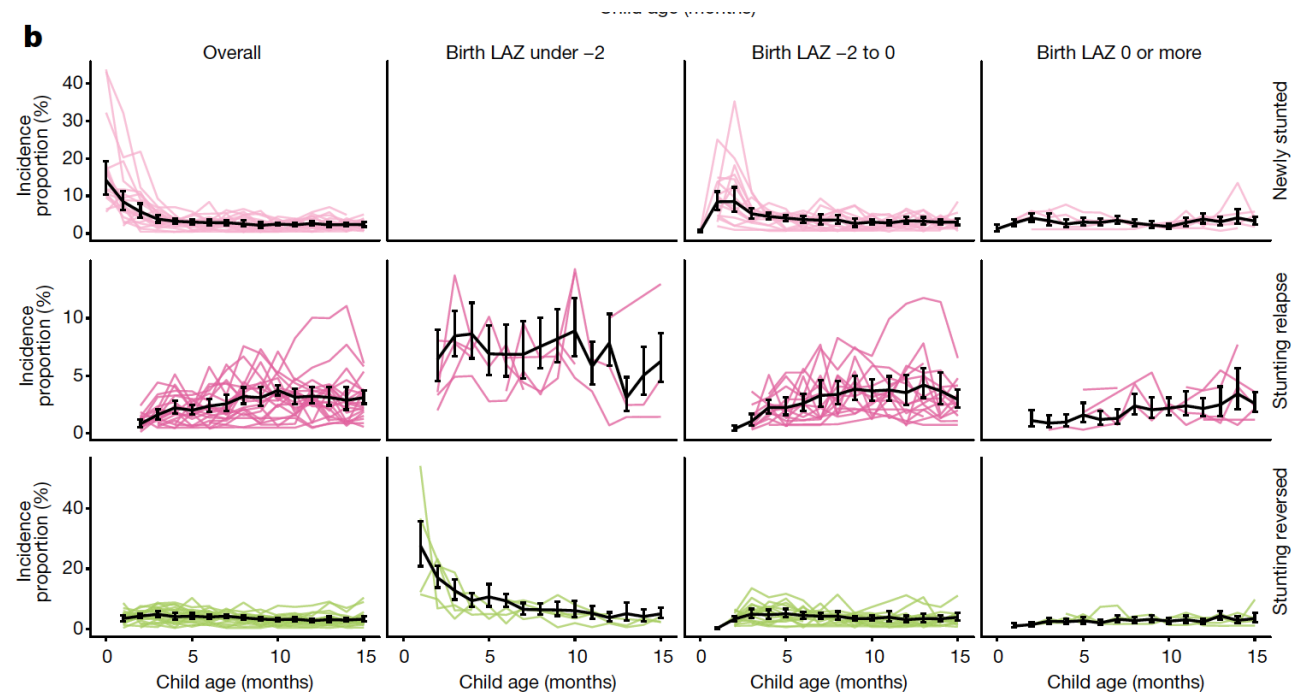

Corrected Figure 4b  
(labeling error corrected)

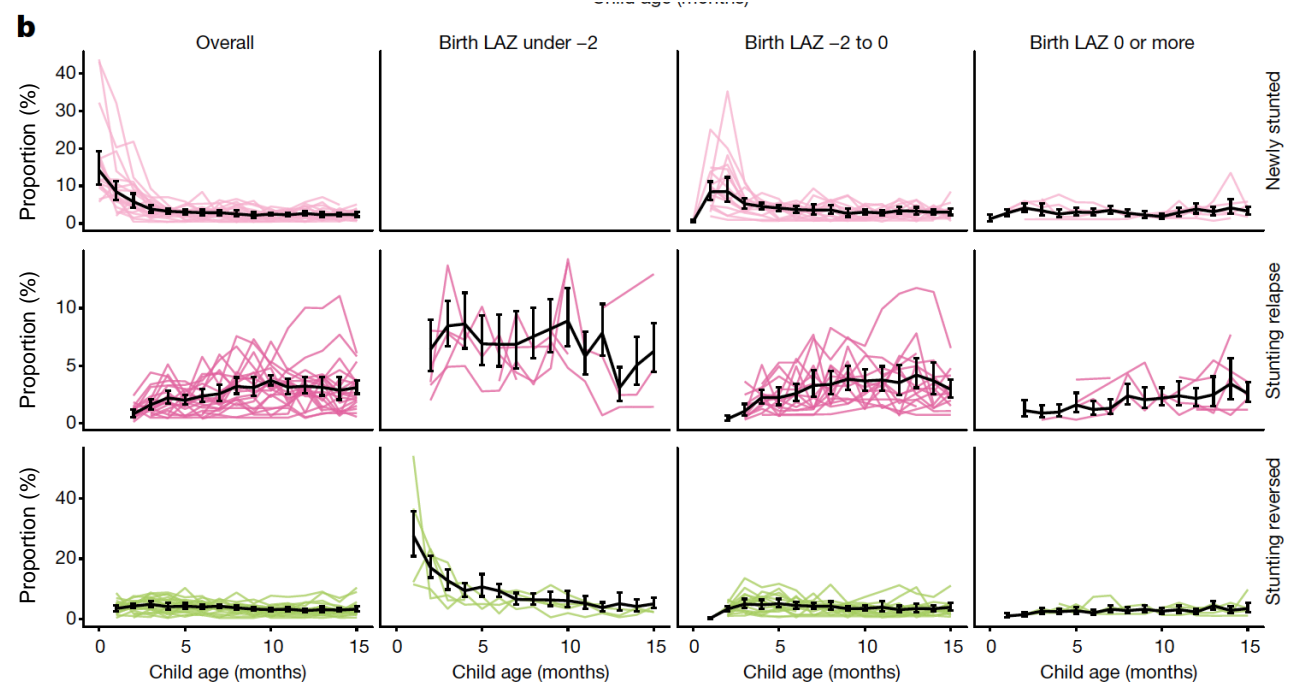

## Original Figure ED8

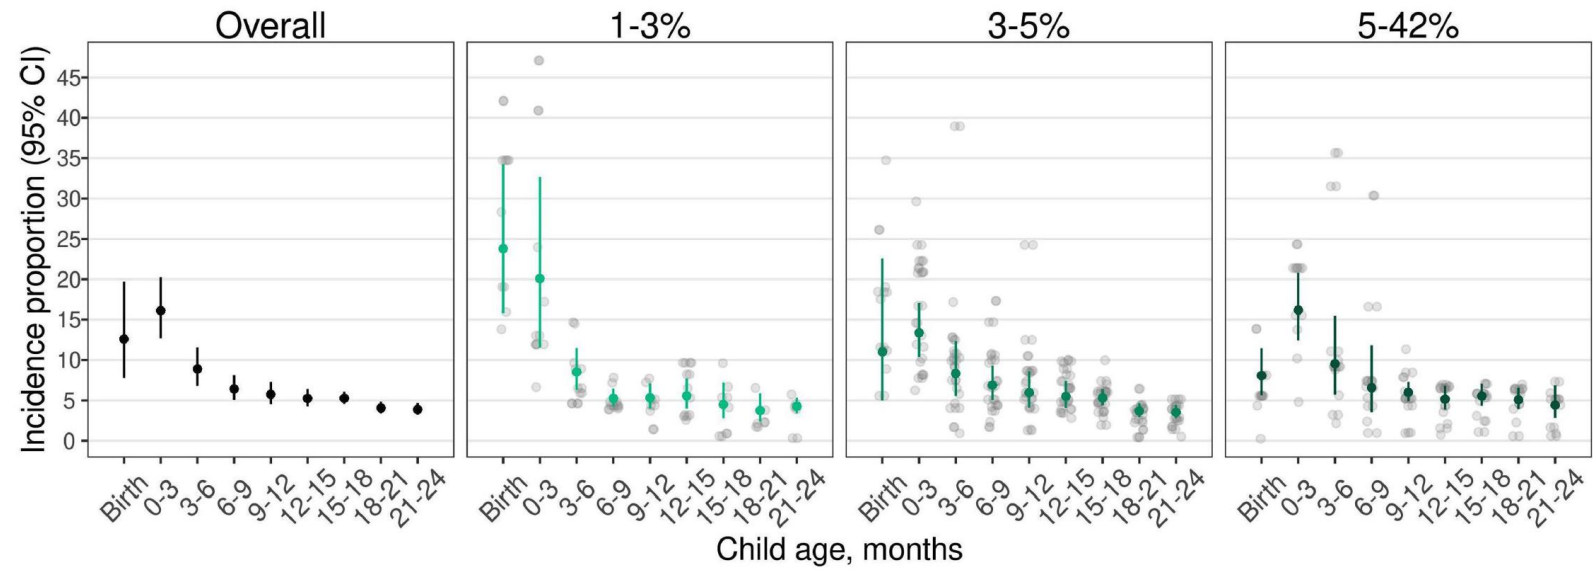

## Corrected Figure ED8 (coding error corrected)

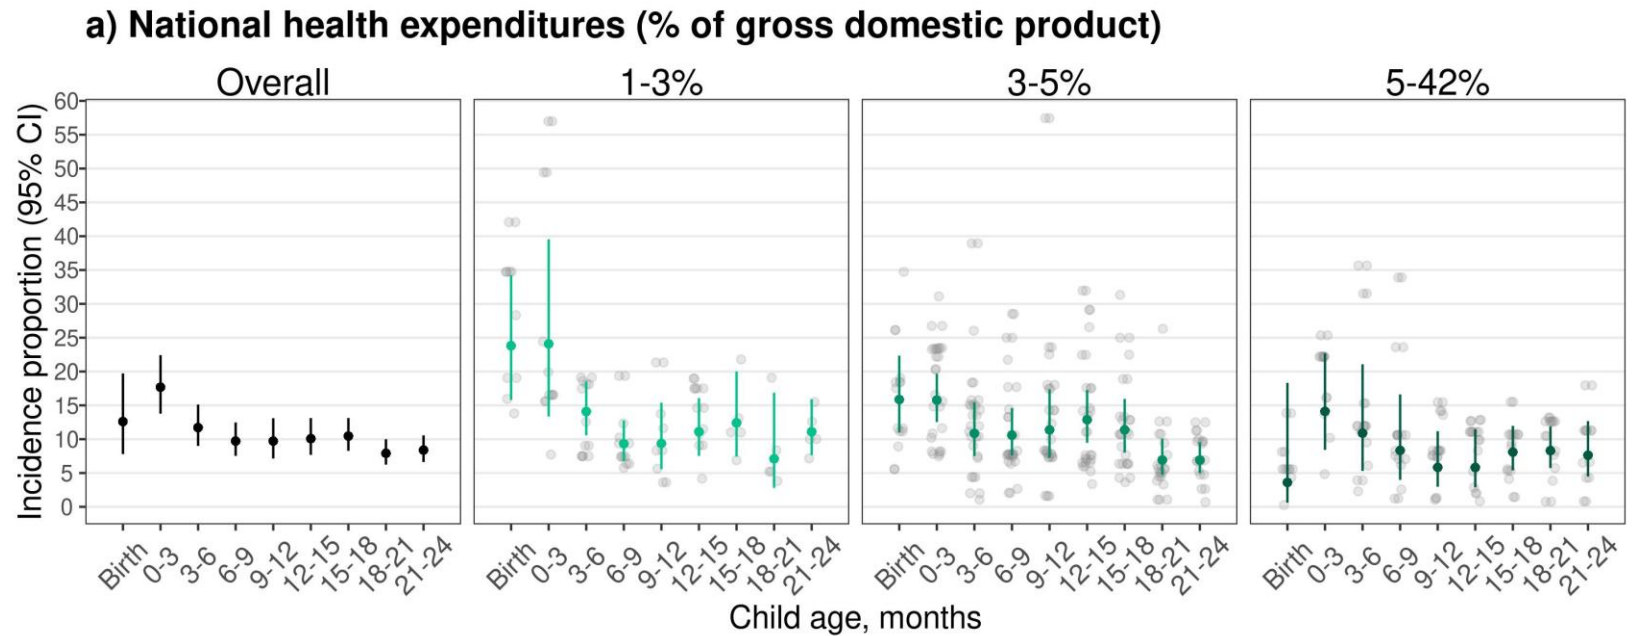

## Original Figure ED9

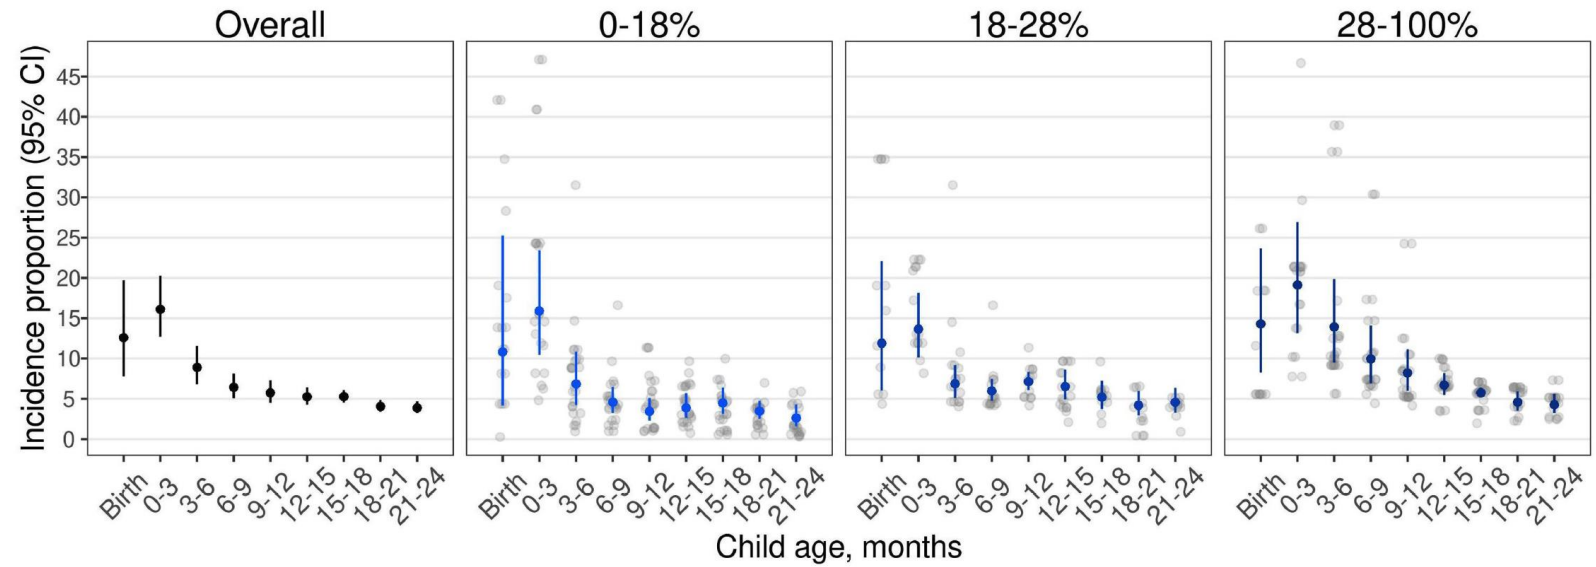

## Corrected Figure ED9 (coding error corrected)

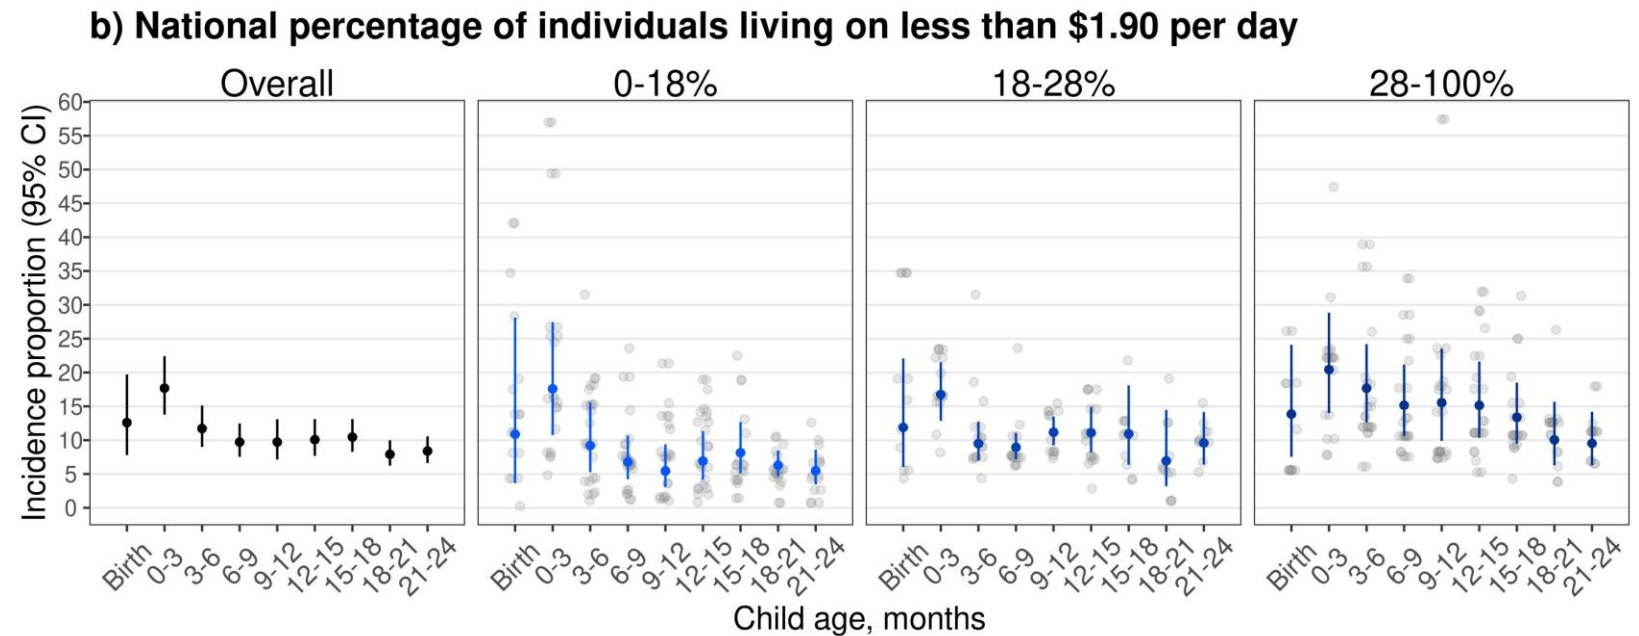

Original Figure ED10

c) National under-5 mortality rate

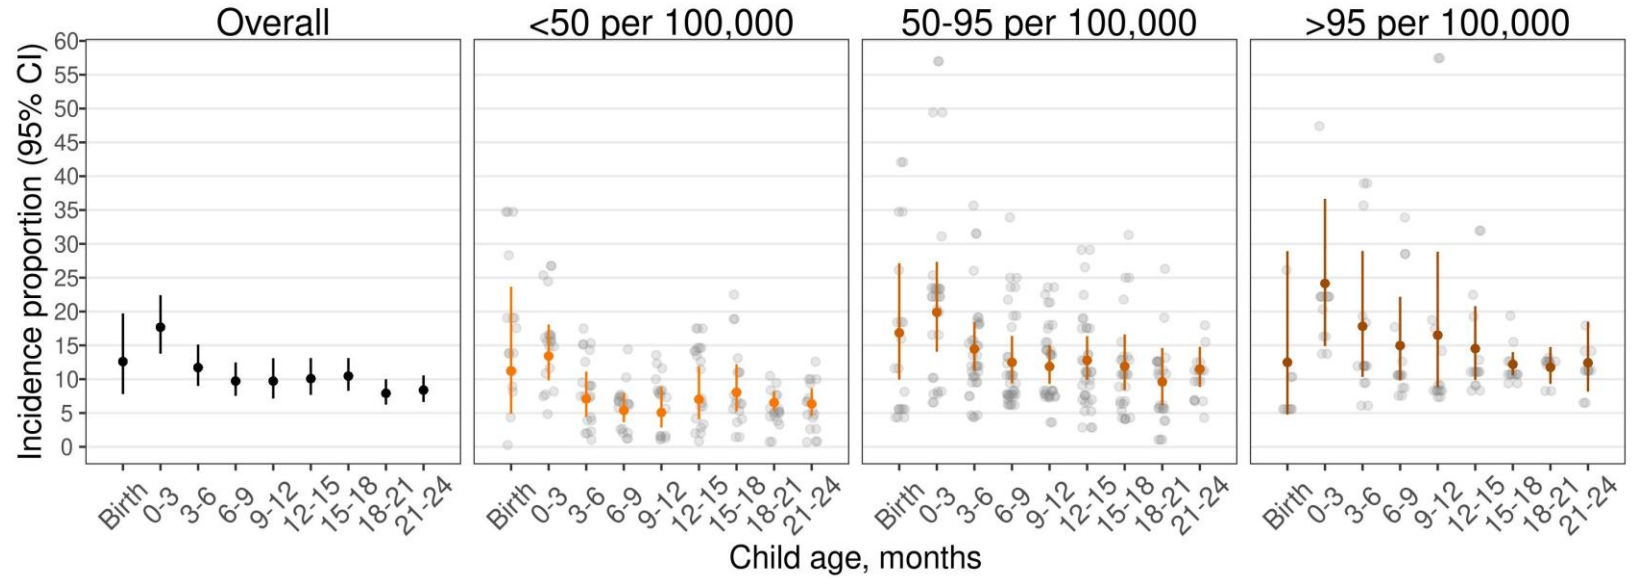

Corrected Figure ED10  
(coding error corrected)

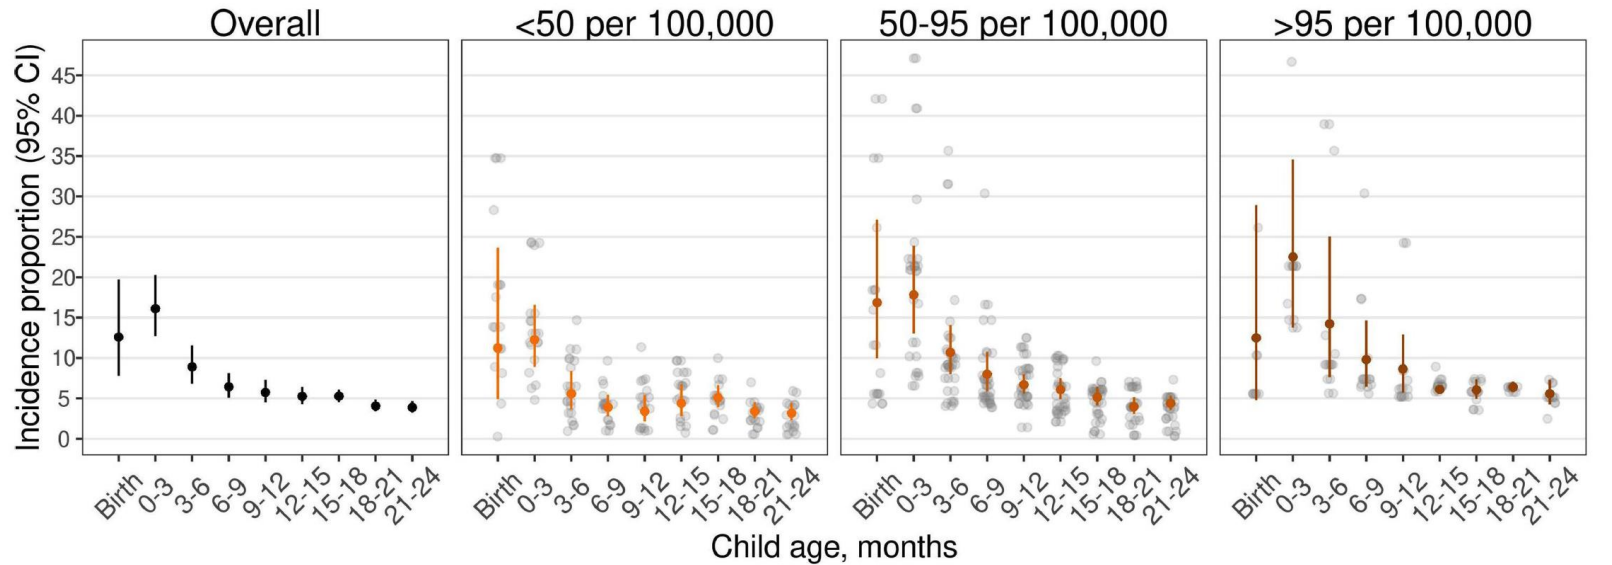

Original Figure ED12

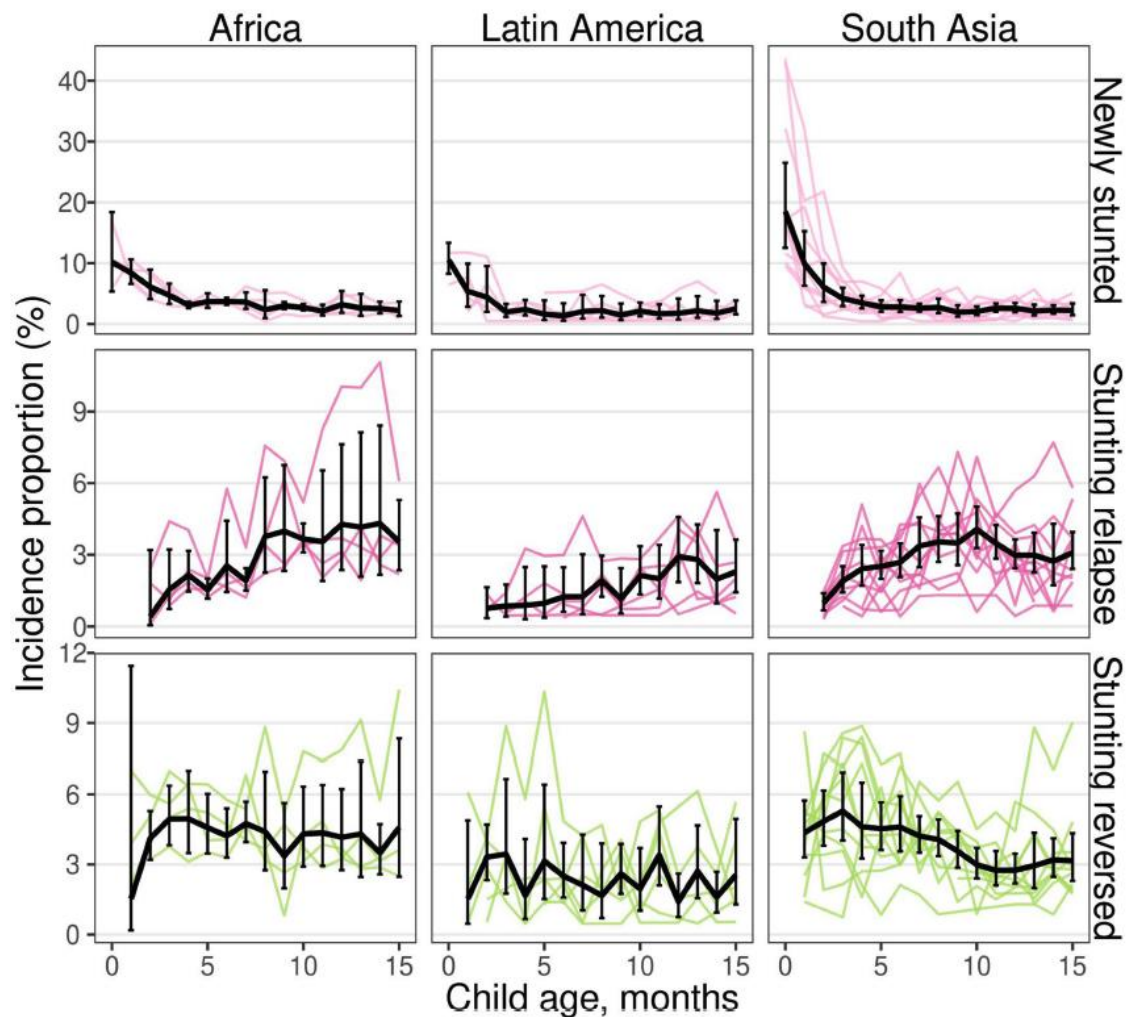

Corrected Figure ED12

(labeling error

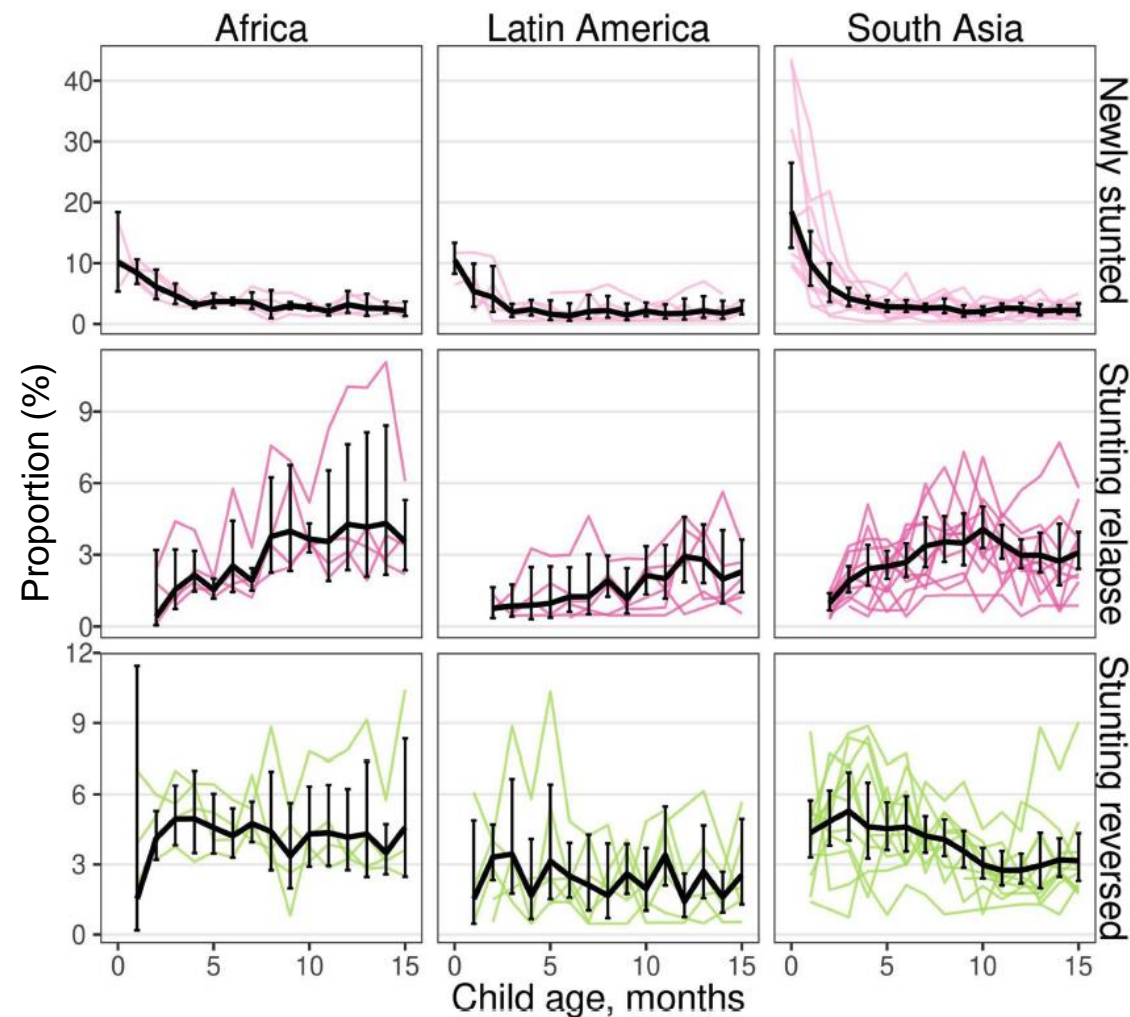

Supplement: 41586_2024_8344_MOESM1_ESM.pdf [file 41586_2024_8344_MOESM1_ESM.pdf]
